# Supplementary material for: Prevention and recovery for peritoneal injury during totally extraperitoneal inguinal hernia repair: A single-center retrospective cohort study
Source: Research Square preprint supplement (doi:10.21203/rs.3.rs-121769/v1), 2020-12-15
Supplement: Supplementary file 1 [file 59a2d5f3b86de0fa06a6a603.xlsx]

## Sheet: Table1
Table 1. Patient characteristics
		Small (n=16)	Large (n=55)	P value
	Age, median (range)	74 (27-81)	69 (27-90)	0.799
	Gender, n (%)
	Male	13 (81.2)	51 (92.7)	0.175
	Female	3 (18.8)	4 (7.3)
	BMI, kg/m2 (±SD)	22.6±2.5	22.6±2.7	0.82
	Comorbidity, n (%)
	Contralateral inguinal hernia repair	2 (12.5)	8 (14.6)	0.836
	Lower abdominal surgery	2 (12.5)	10 (18.2)	0.594
	Cardiovascular	9 (56.3)	19 (34.6)	0.118
	Diabetes	1 (6.3)	7 (12.7)	0.471
	Respiratory	1 (6.3)	3 (5.5)	0.903
	Celebral	0 (0.0)	4 (7.3)	0.267
	Location of hernia, n (%)			0.949
	Right	8 (50.0)	27 (49.1)
	Left	8 (50.0)	28 (50.9)
	Type of hernia*, n (%)			< 0.0001
	I	11 (68.7)	1 (1.8)
	Ⅱ	0 (0.0)	37 (67.3)
	Ⅲa	5 (31.3)	5 (9.1)
	Ⅲb	0 (0.0)	11 (20.0)
	Ⅲc	0 (0.0)	1 (1.8)
	*Nyhus classification

## Sheet: Table2
Table 2. Surgical outcomes
		Small (n=16)	Large (n=55)	P value
	Operative time, median (range)	86.5 (72-142)	129 (63-255)	< 0.0001
	Blood loss, mL (±SD)	1.8±1.7	2.3±1.4	0.054
	Intraoperative complications, n (%)
	Peritoneal injury	1 (6.25)	21 (38.2)	0.015
	Conversion to TAPP	0 (0.0)	4 (7.3)	0.267
	Bleeding	0 (0.0)	0 (0.0)	1
	Postoperative complications, n (%)
	Seroma*	1 (6.3)	6 (10.9)	0.582
	Surgical site infection*	2 (12.5)	1 (1.8)	0.062
	Chronic pain	0 (0.0)	0 (0.0)	1
	Postoperative recurrence	0 (0.0)	0 (0.0)	1
	*Clavien-Dindo Classification Grade I

## Sheet: Table3
Table 3. Location of peritoneal injury during the surgical phase
		Peritoneal injury rate, n (%)	95% CIs	P value
	Phase1	4 (19.0)	0.08-0.40	0.036
	Phase2	3 (14.3)	0.05-0.35
	Phase3	11 (52.4)	0.32-0.72
	Phase4	3 (14.3)	0.05-0.35
	Phase5	0 (0.0)	-

## Sheet: Table4
Table 4. Details of the peritoneal injury cases
	Case	Location of	Maneuver during	Device	Recovery method
		peritoneal injury	peritoneal injury
	1	Phase3	sharp	USAD	Do nothing
	2	Phase3	sharp	Monopolar scissors	Pre-tied suture loop ligation
	3	Phase1	sharp	USAD	Conversion to TAPP
	4	Phase3	sharp	USAD	Do nothing
	5	Phase1	sharp	USAD	Pre-tied suture loop ligation
	6	Phase2	blunt	USAD	Conversion to TAPP
	7	Phase3	sharp	USAD	Pre-tied suture loop ligation
	8	Phase4	blunt	USAD	Pre-tied suture loop ligation
	9	Phase1	sharp	USAD	Conversion to TAPP
	10	Phase4	sharp	USAD	Pre-tied suture loop ligation
	11	Phase2	sharp	USAD	Pre-tied suture loop ligation
	12	Phase3	blunt	USAD	Pre-tied suture loop ligation
	13	Phase2	sharp	USAD	Endoscopic suturing
	14	Phase3	sharp	USAD	Do nothing
	15	Phase3	blunt	USAD	Pre-tied suture loop ligation
	16	Phase3	sharp	USAD	Endoscopic suturing
	17	Phase3	sharp	USAD	Pre-tied suture loop ligation
	18	Phase3	sharp	USAD	Pre-tied suture loop ligation
	19	Phase4	sharp	USAD	Pre-tied suture loop ligation
	20	Phase3	sharp	USAD	Endoscopic suturing
	21	Phase1	sharp	USAD	Conversion to TAPP
	USAD: Ultrasonically activated device

## Sheet: Table5
Table 5. Maneuver method and injury location during Phase 3
		Maneuver during peritoneal injury, n (%)		P value	Injury location during Phase 3, n (%)		P value
		Sharp	Blunt		Medial side	Lateral side
	Phase1	4 (100.0%)	0 (0.0%)	NA
	Phase2	2 (66.7%)	1 (33.3%)	0.333
	Phase3	9 (81.8%)	2 (18.2%)	0.035	8 (72.7%)	3 (27.3%)	0.132
	Phase4	2 (66.7%)	1 (33.3%)	0.333
	NA: Not available
